# Supplementary material
Source: PubMed Central journal article supplement (PMC9378540)
Supplement: NIHMS1808990-supplement-tS1.pdf [file NIHMS1808990-supplement-tS1.pdf]

1 **Supplementary Table S1: Key search terms to identify practice changing clinical trials in**  
2 **focusing on infections in older adults**

3  
4 Search: (infections) OR (infectious) OR (pneumonia )NOT (COVID-19) NOT (SARS-CoV-2)  
5 NOT (HIV) NOT (transplant) Filters: Clinical Trial, in the last 1 year, Humans, English, Aged:  
6 65+ years  
7 (((("infect"[All Fields] OR "infectability"[All Fields] OR "infectable"[All Fields] OR  
8 "infectant"[All Fields] OR "infectants"[All Fields] OR "infected"[All Fields] OR "infecteds"[All  
9 Fields] OR "infectibility"[All Fields] OR "infectible"[All Fields] OR "infecting"[All Fields] OR  
10 "infection s"[All Fields] OR "infections"[MeSH Terms] OR "infections"[All Fields] OR  
11 "infection"[All Fields] OR "infective"[All Fields] OR "infectiveness"[All Fields] OR  
12 "infectives"[All Fields] OR "infectivities"[All Fields] OR "infects"[All Fields] OR  
13 "pathogenicity"[MeSH Subheading] OR "pathogenicity"[All Fields] OR "infectivity"[All Fields]  
14 OR ("infectious"[All Fields] OR "infectiousness"[All Fields]) OR ("pneumonia"[MeSH Terms]  
15 OR "pneumonia"[All Fields] OR "pneumoniae"[All Fields] OR "pneumonias"[All Fields] OR  
16 "pneumoniae s"[All Fields])) NOT ("covid 19"[All Fields] OR "covid 19"[MeSH Terms] OR  
17 "covid 19 vaccines"[All Fields] OR "covid 19 vaccines"[MeSH Terms] OR "covid 19  
18 serotherapy"[All Fields] OR "covid 19 serotherapy"[Supplementary Concept] OR "covid 19  
19 nucleic acid testing"[All Fields] OR "covid 19 nucleic acid testing"[MeSH Terms] OR "covid 19  
20 serological testing"[All Fields] OR "covid 19 serological testing"[MeSH Terms] OR "covid 19  
21 testing"[All Fields] OR "covid 19 testing"[MeSH Terms] OR "sars cov 2"[All Fields] OR "sars  
22 cov 2"[MeSH Terms] OR "severe acute respiratory syndrome coronavirus 2"[All Fields] OR  
23 "ncov"[All Fields] OR "2019 ncov"[All Fields] OR (("coronavirus"[MeSH Terms] OR  
24 "coronavirus"[All Fields] OR "cov"[All Fields]) AND 2019/11/01:3000/12/31[Date -  
25 Publication])) NOT ("sars cov 2"[MeSH Terms] OR "sars cov 2"[All Fields] OR "sars cov  
26 2"[All Fields]) NOT ("hiv"[MeSH Terms] OR "hiv"[All Fields]) NOT ("transplantability"[All  
27 Fields] OR "transplantable"[All Fields] OR "transplantated"[All Fields] OR "transplantating"[All  
28 Fields] OR "transplantation"[MeSH Terms] OR "transplantation"[All Fields] OR  
29 "transplantations"[All Fields] OR "transplanted"[All Fields] OR "transplanting"[All Fields] OR  
30 "transplantation"[MeSH Subheading] OR "transplantation s"[All Fields] OR "transplanter"[All  
31 Fields] OR "transplanters"[All Fields] OR "transplantation"[All Fields] OR "transplants"[MeSH  
32 Terms] OR "transplants"[All Fields] OR "transplant"[All Fields])) AND ((y\_1[Filter]) AND  
33 (clinicaltrial[Filter]) AND (humans[Filter]) AND (english[Filter]) AND (aged[Filter]))  
34 Translations  
35 infections: "infect"[All Fields] OR "infectability"[All Fields] OR "infectable"[All Fields] OR  
36 "infectant"[All Fields] OR "infectants"[All Fields] OR "infected"[All Fields] OR "infecteds"[All  
37 Fields] OR "infectibility"[All Fields] OR "infectible"[All Fields] OR "infecting"[All Fields] OR  
38 "infection's"[All Fields] OR "infections"[MeSH Terms] OR "infections"[All Fields] OR  
39 "infection"[All Fields] OR "infective"[All Fields] OR "infectiveness"[All Fields] OR  
40 "infectives"[All Fields] OR "infectivities"[All Fields] OR "infects"[All Fields] OR  
41 "pathogenicity"[Subheading] OR "pathogenicity"[All Fields] OR "infectivity"[All Fields]  
42 infectious: "infectious"[All Fields] OR "infectiousness"[All Fields]  
43 pneumonia: "pneumonia"[MeSH Terms] OR "pneumonia"[All Fields] OR "pneumoniae"[All  
44 Fields] OR "pneumonias"[All Fields] OR "pneumoniae's"[All Fields]  
45 COVID-19: ("COVID-19" OR "COVID-19"[MeSH Terms] OR "COVID-19 Vaccines" OR  
46 "COVID-19 Vaccines"[MeSH Terms] OR "COVID-19 serotherapy" OR "COVID-19

47 serotherapy"[Supplementary Concept] OR "COVID-19 Nucleic Acid Testing" OR "covid-19  
48 nucleic acid testing"[MeSH Terms] OR "COVID-19 Serological Testing" OR "covid-19  
49 serological testing"[MeSH Terms] OR "COVID-19 Testing" OR "covid-19 testing"[MeSH  
50 Terms] OR "SARS-CoV-2" OR "sars-cov-2"[MeSH Terms] OR "Severe Acute Respiratory  
51 Syndrome Coronavirus 2" OR "NCOV" OR "2019 NCOV" OR (("coronavirus"[MeSH Terms]  
52 OR "coronavirus" OR "COV") AND 2019/11/01[PDAT] : 3000/12/31[PDAT]))  
53 SARS-CoV-2: "sars-cov-2"[MeSH Terms] OR "sars-cov-2"[All Fields] OR "sars cov 2"[All  
54 Fields]  
55 HIV: "hiv"[MeSH Terms] OR "hiv"[All Fields]  
56 transplant: "transplantability"[All Fields] OR "transplantable"[All Fields] OR  
57 "transplantated"[All Fields] OR "transplantating"[All Fields] OR "transplantation"[MeSH  
58 Terms] OR "transplantation"[All Fields] OR "transplantations"[All Fields] OR  
59 "transplanted"[All Fields] OR "transplanting"[All Fields] OR "transplantation"[Subheading] OR  
60 "transplantation's"[All Fields] OR "transplanter"[All Fields] OR "transplanters"[All Fields] OR  
61 "transplantation"[All Fields] OR "transplants"[MeSH Terms] OR "transplants"[All Fields] OR  
62 "transplant"[All Fields]  
63
