# Supplementary material
Source: PubMed Central journal article supplement (PMC9378540)
Supplement: NIHMS1808990-supplement-tS2.pdf [file NIHMS1808990-supplement-tS2.pdf]

**Supplementary Table S2: List of 22 practice changing Randomized Control Trials from 6/2020-7/2021 focusing on infections in older adults**

| Reference                                                                                                                                                                                                                                                                                                                                                                       | Outcome/Result                                                                                                                                                   | Sample Size | Median Age |
|---------------------------------------------------------------------------------------------------------------------------------------------------------------------------------------------------------------------------------------------------------------------------------------------------------------------------------------------------------------------------------|------------------------------------------------------------------------------------------------------------------------------------------------------------------|-------------|------------|
| 1. Molina, J., Montero-Mateos, E., et al. (2021). Seven-versus 14-day course of antibiotics for the treatment of bloodstream infections by Enterobacteriales: a randomized, controlled trial. <i>Clinical Microbiology and Infection</i> .                                                                                                                                      | No significant differences were observed between groups including mortality, relapse of eBSI, relapse of fever, superinfections, or drug-related adverse events. | 248         | 65 years   |
| 2. von Dach, E., Albrich, W. C., Brunel, A. S., Prendki, V., Cuvelier, C., Flury, D., ... & Huttner, A. (2020). Effect of C-reactive protein-guided antibiotic treatment duration, 7-day treatment, or 14-day treatment on 30-day clinical failure rate in patients with uncomplicated gram-negative bacteremia: a randomized clinical trial. <i>Jama</i> , 323(21), 2160-2169. | 7-day was non-inferior to 14 days of antibiotics for uncomplicated gram-negative bacteremia                                                                      | 504         | 79 years   |
| 3. Gariani, K., Pham, T. T., Kressmann, B., Jornayvaz, F. R., Gastaldi, G., Stafylakis, D., ... & Uçkay, L. (2021). Three Weeks Versus Six Weeks of Antibiotic Therapy for Diabetic Foot Osteomyelitis: A Prospective, Randomized, Noninferiority Pilot Trial. <i>Clinical Infectious Diseases</i> , 73(7), e1539-e1545.                                                        | 3 weeks comparable to 6 weeks antibiotic therapy after debridement for diabetic foot osteomyelitis                                                               | 93          | 65         |
| 4. Bernard, L., Arvieux, C., Brunschweiler, B et al. (2021). Antibiotic therapy for 6 or 12 weeks for prosthetic joint infection. <i>New England Journal of Medicine</i> , 384(21), 1991-2001.                                                                                                                                                                                  | Persistent infection occurred in 18.1% of the 6-week group and 9.4% of the 12-week group.                                                                        | 404         | 69 years   |
| 5. Baden, L. R., El Sahly, H. M. et al. (2021). Efficacy and safety of the mRNA-1273 SARS-CoV-2 vaccine. <i>New England Journal of Medicine</i> , 384(5), 403-416.                                                                                                                                                                                                              | The mRNA-1273 vaccine showed 94.1% efficacy at preventing Covid-19 illness, including severe disease.                                                            | 30,420      | 51.4 years |
| 6. Gharbi, M., Drysdale, J. H., et al. (2019). Antibiotic management of urinary tract infection in elderly patients in primary care and its association with bloodstream infections and all cause mortality:                                                                                                                                                                    | No or deferred antibiotics were associated with increase in bloodstream infection and all cause mortality compared with immediate antibiotics.                   | 312,896     | >65years   |

|                                                                                                                                                                                                                                                                                                            |                                                                                                                                                                                                                                       |      |            |
|------------------------------------------------------------------------------------------------------------------------------------------------------------------------------------------------------------------------------------------------------------------------------------------------------------|---------------------------------------------------------------------------------------------------------------------------------------------------------------------------------------------------------------------------------------|------|------------|
| population based cohort study. <i>BMJ</i> , 364.                                                                                                                                                                                                                                                           |                                                                                                                                                                                                                                       |      |            |
| 7. Drekonja, D. M., Trautner, B., et al. (2021). Effect of 7 vs 14 days of antibiotic therapy on resolution of symptoms among afebrile men with urinary tract infection: a randomized clinical trial. <i>JAMA</i> , 326(4), 324-331.                                                                       | 7 days non-inferior to 14 days for male UTI                                                                                                                                                                                           | 272  | 69 years   |
| 8. Dinh, A., Ropers, J., Duran, C., et al. (2021). Discontinuing $\beta$ -lactam treatment after 3 days for patients with community-acquired pneumonia in non-critical care wards (PTC): a double-blind, randomised, placebo-controlled, non-inferiority trial. <i>The Lancet</i> , 397(10280), 1195-1203. | 3 days non-inferior to 8 days for CAP                                                                                                                                                                                                 | 303  | 73 years   |
| 9. CODA Collaborative. (2020). A randomized trial comparing antibiotics with appendectomy for appendicitis. <i>New England Journal of Medicine</i> , 383(20), 1907-1919                                                                                                                                    | Antibiotics were noninferior to appendectomy for appendicitis                                                                                                                                                                         | 1552 | 38 years   |
| 10. Johnson, S. W., Brown, S. V., & Priest, D. H. (2020). Effectiveness of oral vancomycin for prevention of healthcare facility-onset <i>Clostridioides difficile</i> infection in targeted patients during systemic antibiotic exposure. <i>Clinical Infectious Diseases</i> , 71(5), 1133-1139.         | Oral vancomycin prophylaxis reduces <i>C. difficile</i> recurrence                                                                                                                                                                    | 100  | >70 years  |
| 11. Group, T. R. C. (2020). Dexamethasone in hospitalized patients with Covid-19—preliminary report. <i>The New England journal of medicine</i> .                                                                                                                                                          | In patients hospitalized with Covid-19, the use of dexamethasone resulted in lower 28-day mortality among those who were receiving either invasive mechanical ventilation or oxygen                                                   | 4425 | >65 years  |
| 12. Spinner, C. D., Gottlieb, R. L., et al. (2020). Effect of remdesivir vs standard care on clinical status at 11 days in patients with moderate COVID-19: a randomized clinical trial. <i>JAMA</i> , 324(11), 1048-1057.                                                                                 | Among patients with moderate COVID-19 patients randomized to a 5-day course of remdesivir had a statistically significant difference in clinical status compared with standard care, but not those who received 10 days of remdesivir | 596  | 57 years   |
| 13. Kalil, A. C., Patterson, T. F., et al. (2021). Baricitinib plus remdesivir for hospitalized adults with Covid-19.                                                                                                                                                                                      | Baricitinib plus remdesivir was superior to remdesivir alone in reducing recovery time and                                                                                                                                            | 1033 | 55.4 years |

|                                                                                                                                                                                                                                                                                                       |                                                                                                                                                                                                                                  |     |            |
|-------------------------------------------------------------------------------------------------------------------------------------------------------------------------------------------------------------------------------------------------------------------------------------------------------|----------------------------------------------------------------------------------------------------------------------------------------------------------------------------------------------------------------------------------|-----|------------|
| <i>New England Journal of Medicine</i> , 384(9), 795-807.                                                                                                                                                                                                                                             | accelerating improvement in clinical status among patients with Covid-19, notably among those receiving high-flow oxygen or noninvasive ventilation.                                                                             |     |            |
| 14. Cohen, M. S., Nirula, A., et al. (2021). Effect of bamlanivimab vs placebo on incidence of COVID-19 among residents and staff of skilled nursing and assisted living facilities: a randomized clinical trial. <i>JAMA</i> , 326(1), 46-55.                                                        | Bamlanivimab monotherapy compared with placebo reduced the risk of COVID-19 in residents and staff of skilled nursing and assisted living facilities.                                                                            | 966 | 53 years   |
| 15. Hermine, O., Mariette, X., et al. (2021). Effect of tocilizumab vs usual care in adults hospitalized with COVID-19 and moderate or severe pneumonia: a randomized clinical trial. <i>JAMA internal medicine</i> , 181(1), 32-40.                                                                  | Tocilizumab may reduce the need for mechanical and noninvasive ventilation or death by day 14 but not mortality by day 28.                                                                                                       | 131 | 64 years   |
| 16. Simonovich, V. A., Burgos Pratz, L. D., et al. (2021). A randomized trial of convalescent plasma in Covid-19 severe pneumonia. <i>New England Journal of Medicine</i> , 384(7), 619-629.                                                                                                          | No significant differences were observed in clinical status or overall mortality                                                                                                                                                 | 228 | 62 years   |
| 17. Self, W. H., Semler, M. W., et al. (2020). Effect of hydroxychloroquine on clinical status at 14 days in hospitalized patients with COVID-19: a randomized clinical trial. <i>JAMA</i> , 324(21), 2165-2176.                                                                                      | Among adults hospitalized with respiratory illness from COVID-19, treatment with hydroxychloroquine, compared with placebo, did not significantly improve clinical status at day 14.                                             | 479 | 57 years   |
| 18. Murai, I. H., Fernandes, A. L., et al. (2021). Effect of a single high dose of vitamin D3 on hospital length of stay in patients with moderate to severe COVID-19: a randomized clinical trial. <i>JAMA</i> , 325(11), 1053-1060.                                                                 | Among hospitalized patients with COVID-19, a single high dose of vitamin D3, compared with placebo, did not significantly reduce hospital length of stay.                                                                        | 240 | 56.2 years |
| 19. Thomas, S., Patel, D., et al. (2021). Effect of high-dose zinc and ascorbic acid supplementation vs usual care on symptom length and reduction among ambulatory patients with SARS-CoV-2 infection: the COVID A to Z randomized clinical trial. <i>JAMA network open</i> , 4(2), e210369-e210369. | High-dose zinc gluconate, ascorbic acid, or a combination of the 2 supplements did not significantly decrease the duration of symptoms compared with standard of care in ambulatory patients diagnosed with SARS-CoV-2 infection | 214 | 45.2 years |
| 20. Reis, G., Silva, E. A. D. S. M., et al. (2021). Effect of early treatment with hydroxychloroquine or lopinavir and ritonavir on risk of hospitalization                                                                                                                                           | Neither hydroxychloroquine nor lopinavir-ritonavir showed any significant benefit for decreasing COVID-19–                                                                                                                       | 685 | 53 years   |

|                                                                                                                                                                                                                                                           |                                                                                                                                                                |     |          |
|-----------------------------------------------------------------------------------------------------------------------------------------------------------------------------------------------------------------------------------------------------------|----------------------------------------------------------------------------------------------------------------------------------------------------------------|-----|----------|
| among patients with COVID-19: the TOGETHER randomized clinical trial. <i>JAMA network open</i> , 4(4), e216468-e216468.                                                                                                                                   | associated hospitalization or other secondary clinical outcomes.                                                                                               |     |          |
| 21. Abella, B. S., Jolkovsky, E. L., et al. (2021). Efficacy and safety of hydroxychloroquine vs placebo for pre-exposure SARS-CoV-2 prophylaxis among health care workers: a randomized clinical trial. <i>JAMA internal medicine</i> , 181(2), 195-202. | No clinical benefit of hydroxychloroquine administered daily for 8 weeks as pre-exposure prophylaxis in health-care workers exposed to patients with COVID-19. | 132 | 33 years |
| 22. López-Medina, E., López, P., et al. (2021). Effect of ivermectin on time to resolution of symptoms among adults with mild COVID-19: a randomized clinical trial. <i>JAMA</i> , 325(14), 1426-1435.                                                    | Among adults with mild COVID-19, a 5-day course of ivermectin, compared with placebo, did not significantly improve the time to resolution of symptoms.        | 476 | 37 years |
